# Supplementary material for: Exercise conditioned plasma dampens inflammation via clusterin and boosts memory
Source: bioRxiv or medRxiv preprint supplement (doi:10.1101/775288), 2019-09-19
Supplement: Supplementary file [file media-5.pdf]

# Exercise conditioned plasma dampens inflammation via clusterin and boosts memory

## Extended data 5

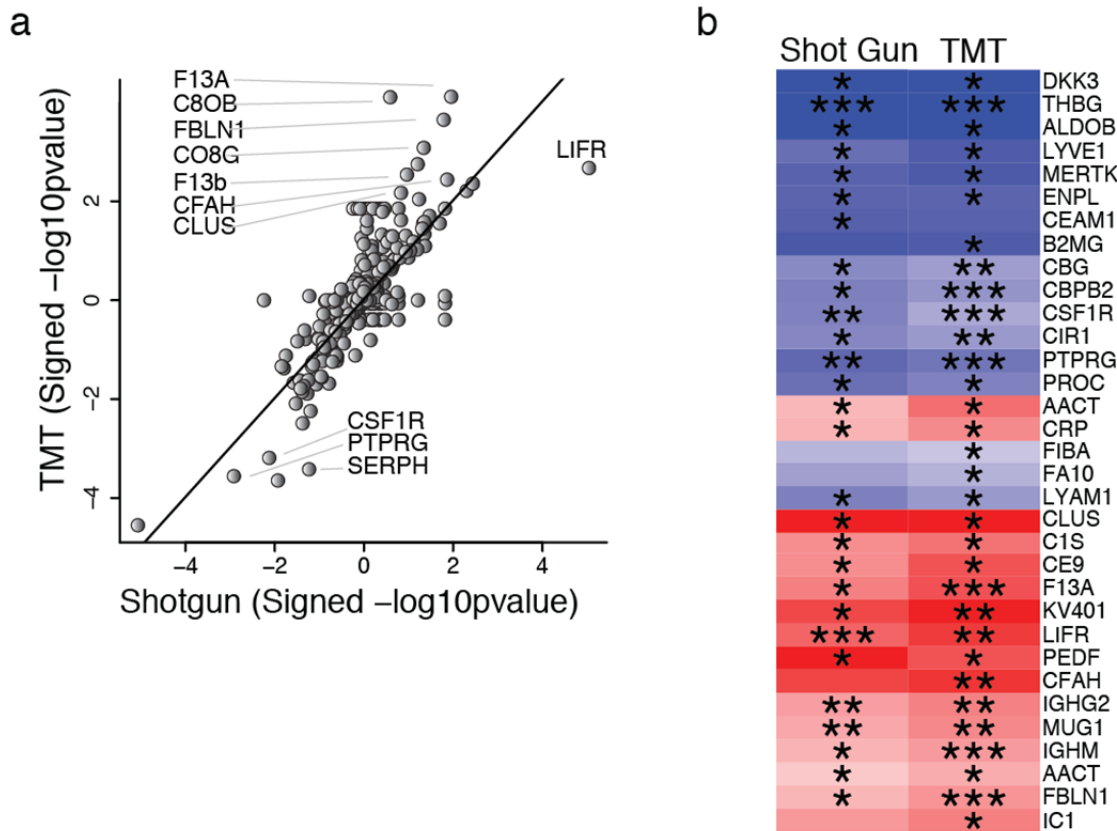

### Extended data 5. Validation of proteins captured with TMT-LC MS/MS using shotgun-LC MS/MS detection and analysis.

**a**, Plot show the correlation of proteins significantly changed in plasma pools from runners and controls (n = 8 per group), in X-axis detected in TMT-LC MS/MS relative quantification, and in Y-axis detected in shotgun-LC MS/MS relative.

**b**, Heat map depicting the relative levels of the top differentially expressed plasma proteins detected with TMT- or shotgun- LC MS/MS.

Means  $\pm$  s.e.m; Unpaired Student's two-tailed *t* test; \* *P* < 0.05, \*\* *P* < 0.01 and \*\*\* *P* < 0.001
