# Supplementary material for: Exercise conditioned plasma dampens inflammation via clusterin and boosts memory
Source: bioRxiv or medRxiv preprint supplement (doi:10.1101/775288), 2019-09-19
Supplement: Supplementary file [file media-7.pdf]

# Exercise conditioned plasma dampens inflammation via clusterin and boosts memory

## Extended data 7

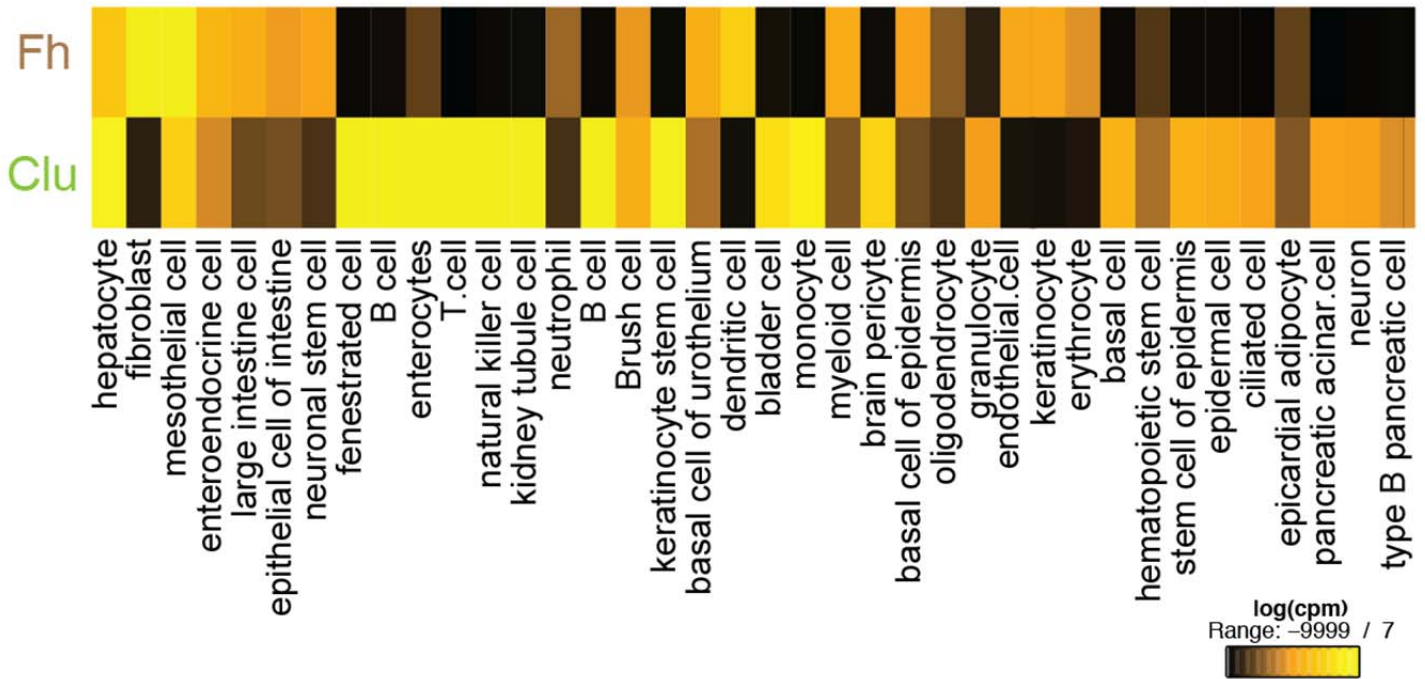

### Extended data 7. Expression of *Clu* and *Fh* in different cell types.

Heat map showing expression of *Clu* and *Fh* in different cell types based on single cell gene expression in the Tabula Muris Atlas <sup>1</sup>

### Reference

- 1 Tabula Muris, C. *et al.* Single-cell transcriptomics of 20 mouse organs creates a Tabula Muris. *Nature* **562**, 367-372, doi:10.1038/s41586-018-0590-4 (2018).
