# Supplementary material for: Exercise conditioned plasma dampens inflammation via clusterin and boosts memory
Source: bioRxiv or medRxiv preprint supplement (doi:10.1101/775288), 2019-09-19
Supplement: Supplementary file [file media-9.pdf]

# Exercise conditioned plasma dampens inflammation via clusterin and boosts memory

## Extended data table 2

### Patient demographics

|                                    |              |
|------------------------------------|--------------|
| Age, mean (SD), years              | 69.68 ± 7.95 |
| Gender male, n (%)                 | 19 (95)      |
| number per group                   | 20           |
| Married, n (%)                     | 15 (75)      |
| Education above high school, n (%) | 18 (90)      |
| Employed, full-time, n (%)         | 4 (20)       |
| Ethnicity, Not Hispanic, n (%)     | 15 (75)      |
| Race (white), n (%)                | 15 (75)      |
| BMI, mean (SD), kg/m <sup>2</sup>  | 27.71 (3.76) |
| Diagnose - APOE                    |              |
| 2/3                                | 3 (15)       |
| 2/4                                | 0            |
| 3/3                                | 14 (70)      |
| 3/4                                | 3 (15)       |

Extended data table 2. Patient demographics
