# Supplementary material for: Exercise conditioned plasma dampens inflammation via clusterin and boosts memory
Source: bioRxiv or medRxiv preprint supplement (doi:10.1101/775288), 2019-09-19
Supplement: Supplementary file [file media-10.pdf]

## Exercise conditioned plasma dampens inflammation via clusterin and boosts memory

**Extended data table 3**

| Antibody     | Species | Concentration | Manufacturer             | Catalogue number | Manufacturer application recommendations and validation                                                                                                                                                                     |
|--------------|---------|---------------|--------------------------|------------------|-----------------------------------------------------------------------------------------------------------------------------------------------------------------------------------------------------------------------------|
| BrdU         | Rat     | 1:2500        | Abcam                    | ab6326           | This antibody reacts with BrdU (5-Bromo-2'-deoxyuridine) in single stranded DNA, BrdU attached to a protein carrier or free BrdU. It detects nucleated cells that have had BrdU incorporated into their DNA during S phase. |
| GFAP         | Mouse   | 1:1000        | Millipore                | MAB360           | Species reactivity: mouse. Tested in human brain tissue. We control tested this antibody using negative controls (no primary antibody).                                                                                     |
| SOX2         | Goat    | 1:1000        | Santa Cruz Biotechnology | sc-365823        | Recommended for detection of Sox-2 of mouse. Control tested in human esophagus tissue and C6 and 293 cell lysates. We control tested this antibody using negative controls (no primary antibody).                           |
| NeuN         | Mouse   | 1:1000        | Millipore                | MAB377           | Species reactivity: mouse. Tested in mouse dentate gyrus and rat cerebellum.                                                                                                                                                |
| Doublecortin | Goat    | 1:500         | Santa Cruz Biotechnology | sc-8066          | Recommended for detection of Doublecortin of mouse. We control tested this antibody using negative controls (no primary antibody) and comparison to already published doublecortin stainings.                               |
| Clusterin    | Rabbit  | N/A           | Abcam                    | ab184100         | Species reactivity: mouse. Tested in mouse serum, lung and adrenal gland lysate. Control test in rats.                                                                                                                      |
| PEDF         | Goat    | N/A           | R&D Systems              | AF1149           | Species reactivity: mouse. Tested in C2C12 , NIH-3T3 and 3T3-L1 mouse cell lines.                                                                                                                                           |
| Factor H     | Sheep   | N/A           | Abcam                    | ab8842           | Species reactivity: mouse. Tested in mouse serum.                                                                                                                                                                           |
| LIFR         | Rabbit  | N/A           | Proteintech              | 22779-1-AP       | Species specificity: mouse. Tested in mouse and human skeletal muscle tissue                                                                                                                                                |

**Extended data table 3. Primary antibody information**
